# Supplementary material
Source: Springer Nature journal article supplement (https://www.springermedizin.de/resource/supplementary/12935_2011_311_MOESM10_ESM.pdf/9540272)

**Fig. 9**

**A**

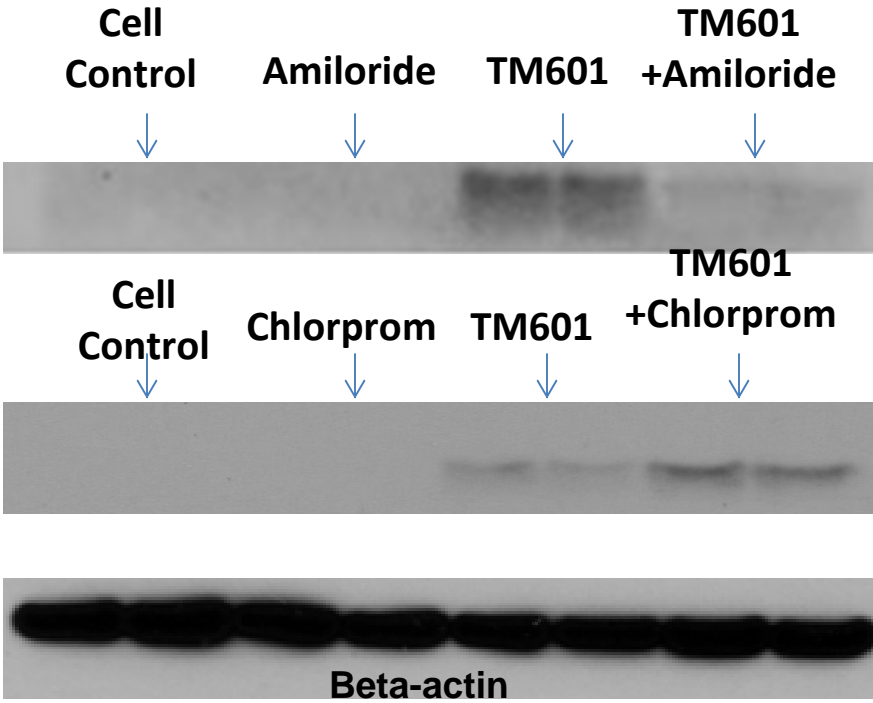

**B**

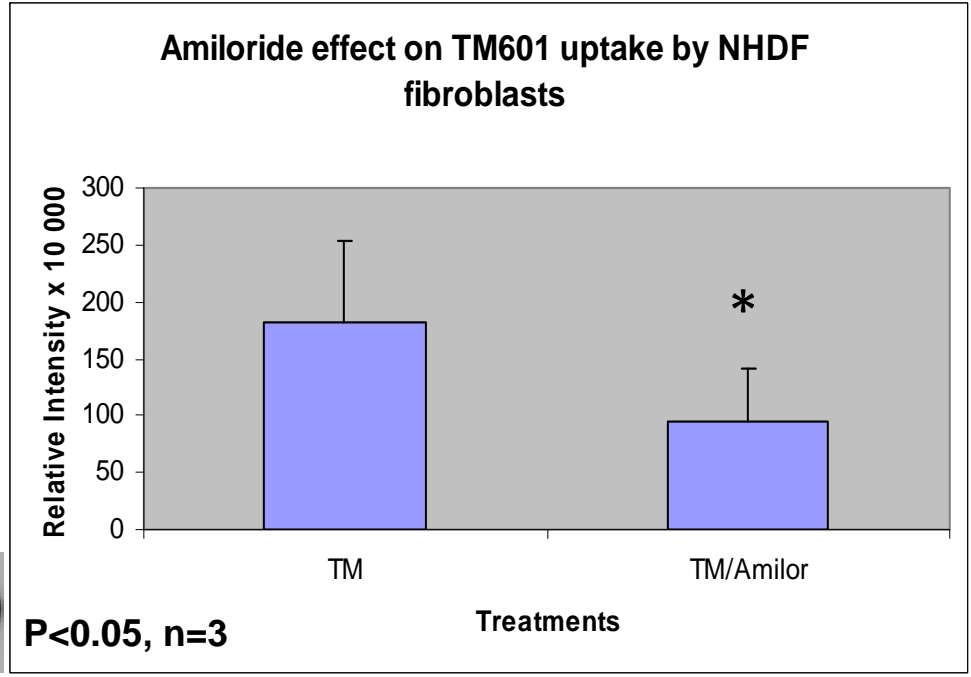

Supplement: MOESM10 [file 9540272]
